# Supplementary material for: Impact of common genetic determinants of Hemoglobin A1c on type 2 diabetes risk and diagnosis in ancestrally diverse populations: A transethnic genome-wide meta-analysis
Source: PubMed Central journal article supplement (PMC5595282; doi:10.1371/journal.pmed.1002383), 2017-09-12

**S1 Fig.** Diagram describing the flow of our study

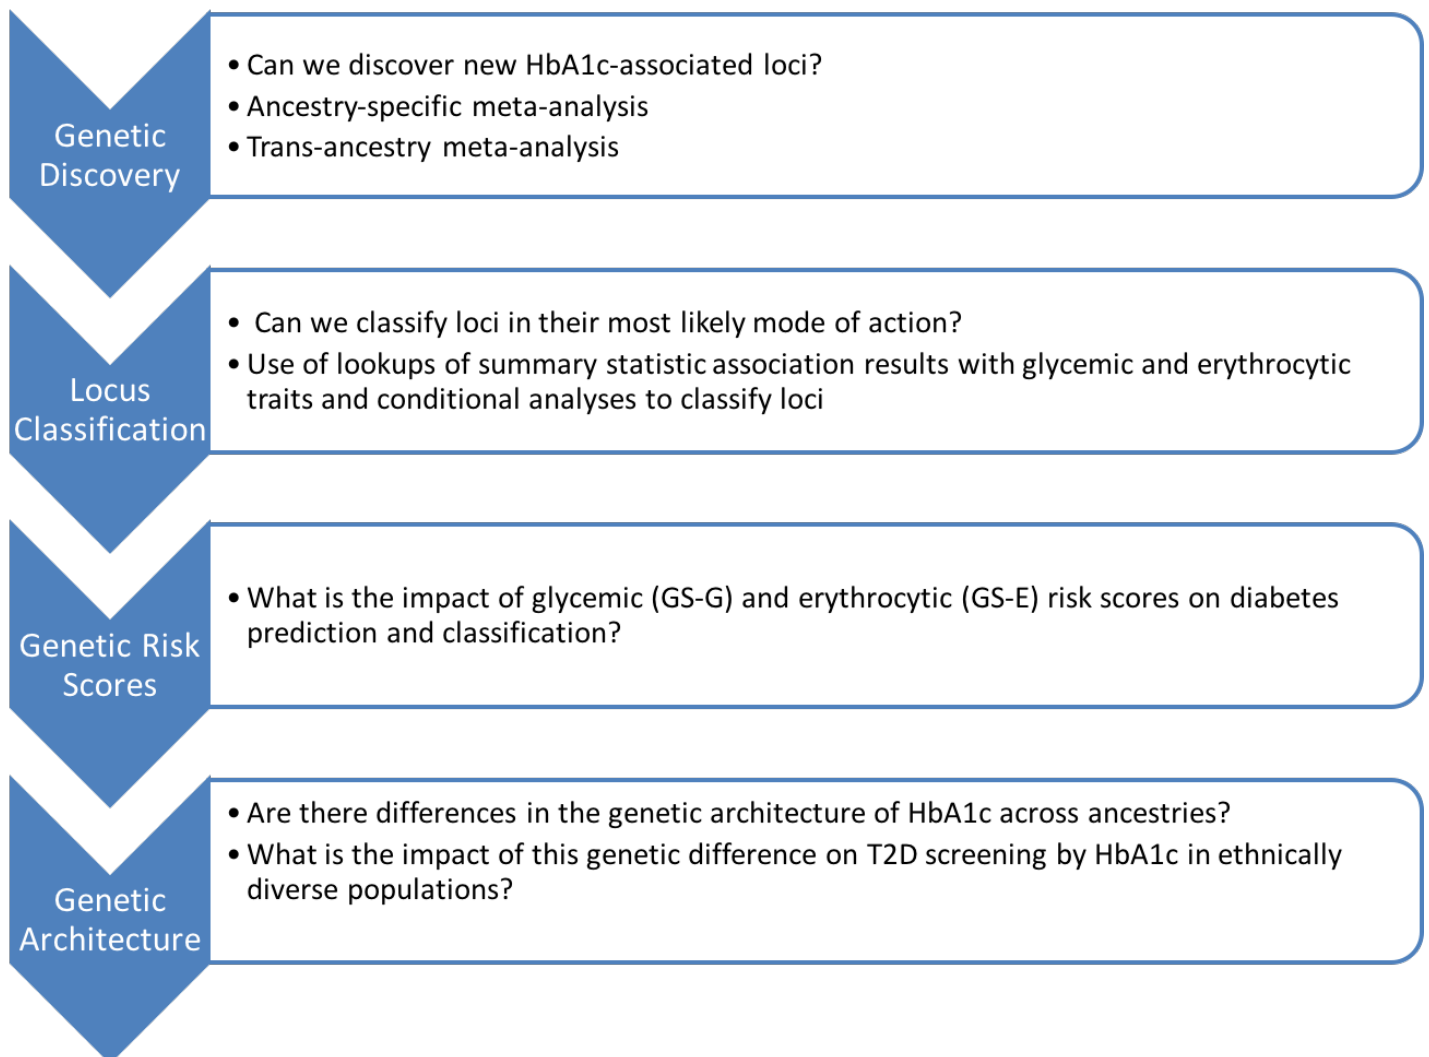

Supplement: pmed.1002383.s014.pdf [file pmed.1002383.s014.pdf]
