# Supplementary material for: Impact of common genetic determinants of Hemoglobin A1c on type 2 diabetes risk and diagnosis in ancestrally diverse populations: A transethnic genome-wide meta-analysis
Source: PubMed Central journal article supplement (PMC5595282; doi:10.1371/journal.pmed.1002383), 2017-09-12
Supplement: pmed.1002383.s015.pdf [file pmed.1002383.s015.pdf]

**S2 Fig.** Overview of participants included in the genetic discovery analysis.

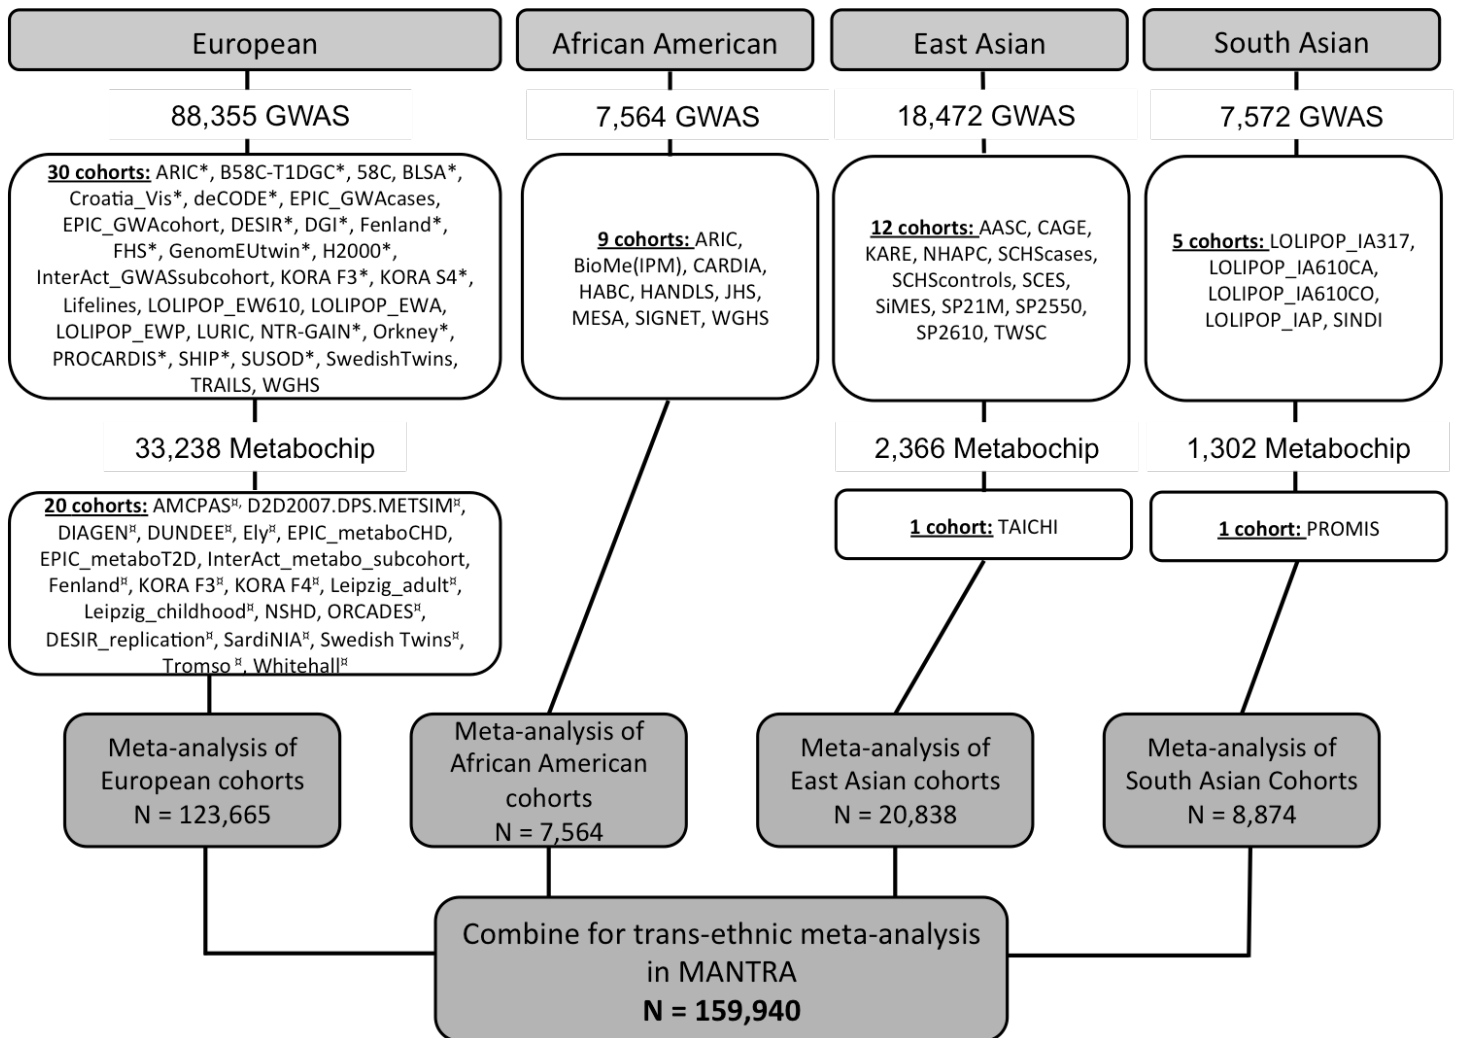

\* Soranzo et al, # Scott et al
