# Supplementary material for: Impact of common genetic determinants of Hemoglobin A1c on type 2 diabetes risk and diagnosis in ancestrally diverse populations: A transethnic genome-wide meta-analysis
Source: PubMed Central journal article supplement (PMC5595282; doi:10.1371/journal.pmed.1002383), 2017-09-12
Supplement: pmed.1002383.s016.pdf [file pmed.1002383.s016.pdf]

**S3 Fig.** Overview of the classification of genetic variants as glycemic, erythrocytic or unclassified.

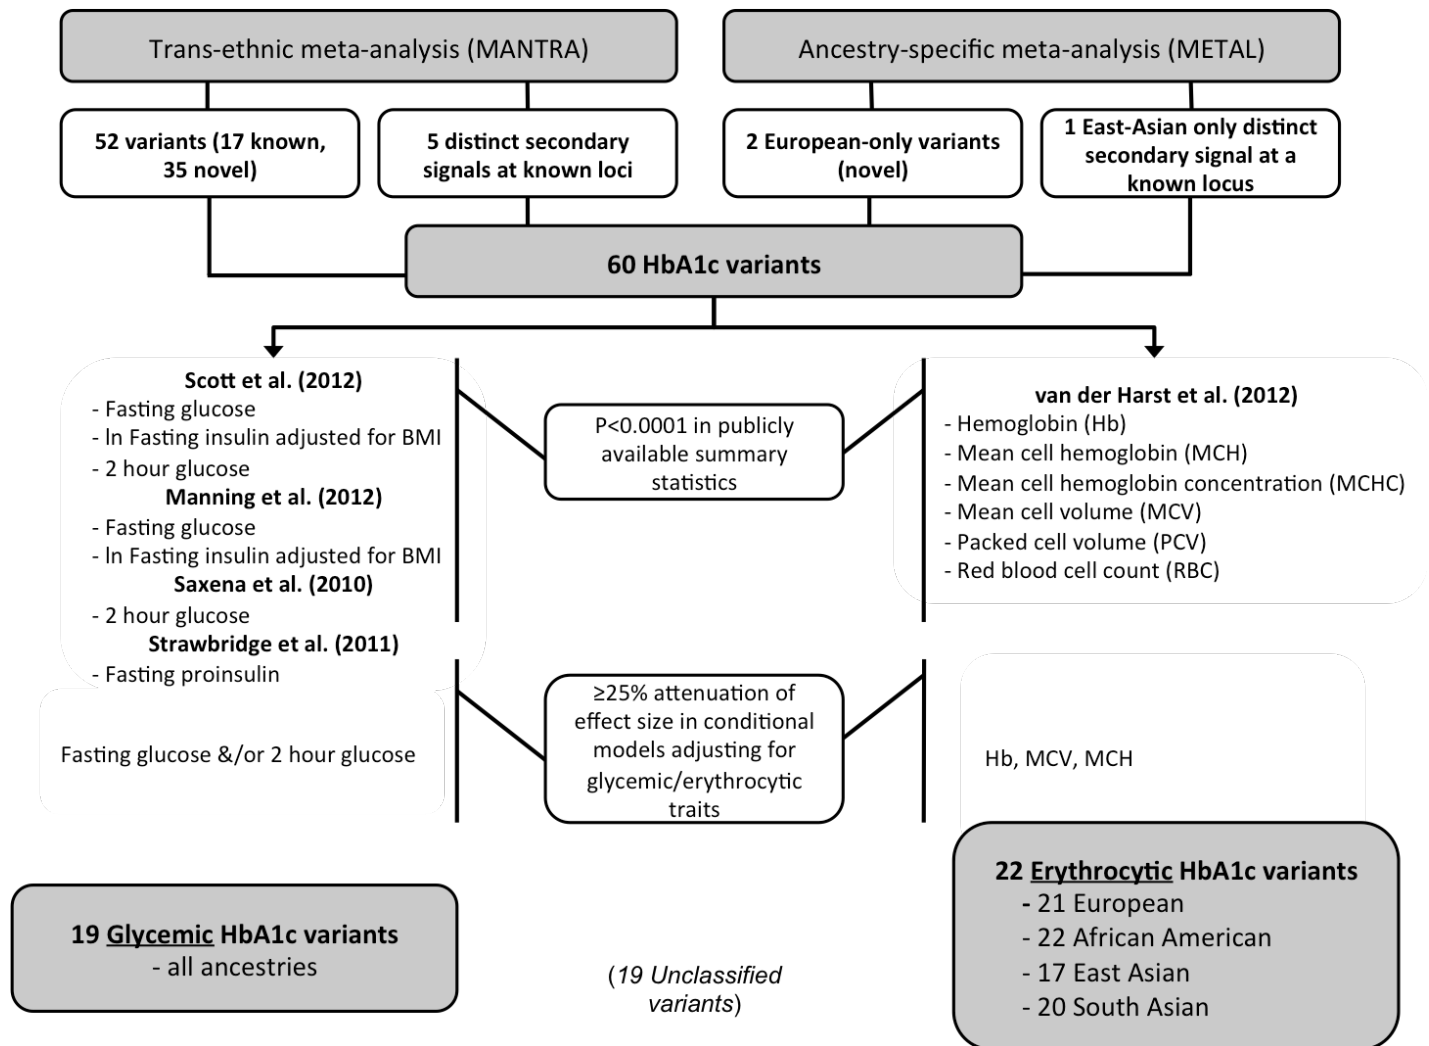

A single variant (rs579459 near *ABO*) was classified as both glycemic and erythrocytic, but treated as glycemic in all analyses.
