# Supplementary material for: Impact of common genetic determinants of Hemoglobin A1c on type 2 diabetes risk and diagnosis in ancestrally diverse populations: A transethnic genome-wide meta-analysis
Source: PLoS Med. 2017 Sep 12;14(9):e1002383. doi: 10.1371/journal.pmed.1002383 (PMC5595282; doi:10.1371/journal.pmed.1002383)
Supplement: S1 Table — (XLSX) [file pmed.1002383.s002.xlsx]

## Sheet: S1 Table
S1 Table. Cohort information, genotyping, quality control (QC), glycated hemoglobin (HbA1c), analysis and covariates.
	COHORT	ARIC	B58C-T1DGC	58C	BLSA	Croatia_Vis	deCODE	EPIC_GWA cases	EPIC_GWA cohort	DESIR	DGI	Fenland	FHS	GenomeEUtwin	HEALTH2000	InterAct (GWASsubcohort)	KORA F3	KORA S4	Lifelines	LOLIPOP_EW610 (updated)	LOLIPOP_EW_A	LOLIPOP_EW_P	LURIC	NTR	ORCADES	PROCARDIS	SHIP	Sorbs	Swedish Twins	TRAILS - Population cohort	WGHS (HbA1c ≥ 6.5% excluded)	METSIM	NHANES	Roche	Segovia	AMCPAS	FIN-D2D 2007	DPS	METSIM	DIAGEN	GoDARTS	Ely	EPIC Metabo-CHD	EPIC Metabo T2D Controls	InterAct Metabo Sub-cohort	Fenland	KORAF3	KORAF4	LEIPZIG_ADULT_IFB
	NAME (if different)																								Orkney Complex Disease Study (ORCADES)		Study of Health in Pomerania (SHIP)		Swedish Twin Registry	TRacking Adolescents' Individual Lives Survey - Population cohort		Metabolic Syndrome in Men				The Academic Medical Center Amsterdam Premature Atherosclerosis Study			Metabolic Syndrome in Men							Fenland	KORAF3	KORAF4
		European ancestry	European ancestry	European ancestry	European ancestry	European ancestry	European ancestry	European ancestry	European ancestry	European ancestry	European ancestry	European ancestry	European ancestry	European ancestry	European ancestry	European ancestry	European ancestry	European ancestry	European ancestry	European ancestry	European ancestry	European ancestry	European ancestry	European ancestry	European ancestry	European ancestry	European ancestry	European ancestry	European ancestry	European ancestry	European ancestry	European ancestry	European ancestry	European ancestry	European ancestry	European ancestry	European ancestry	European ancestry	European ancestry	European ancestry	European ancestry	European ancestry	European ancestry	European ancestry	European ancestry	European ancestry	European ancestry	European ancestry	European ancestry
		GWAS	GWAS	GWAS	GWAS	GWAS	GWAS	GWAS	GWAS	GWAS	GWAS	GWAS	GWAS	GWAS	GWAS	GWAS	GWAS	GWAS	GWAS	GWAS	GWAS	GWAS	GWAS	GWAS	GWAS	GWAS	GWAS	GWAS	GWAS	GWAS	GWAS	Soranzo et al. de novo genotyping	Soranzo et al. de novo genotyping	Soranzo et al. de novo genotyping	Soranzo et al. de novo genotyping	METABOCHIP	METABOCHIP	METABOCHIP	METABOCHIP	METABOCHIP	METABOCHIP	METABOCHIP	METABOCHIP	METABOCHIP	GWAS	METABOCHIP	METABOCHIP	METABOCHIP	METABOCHIP
	Ethnicity	Self Reported US whites	European descent	European descent	European descent	European descent	European descent	European descent	European descent	European descent	Scandinavian	European descent	European descent	European descendent	Finnish	European descent	European descent	European descent	European descent	European descent	European descent	European descent	European descent	European descent	European descent	European descent	European descent	European descent	Swedish	European descent	European descent	European descent	European ancestry	European descent	European descent	European descent	European descent	European descent	European descent	European descent	European descent	European descent	European descent	European descent	European descent	European descent	European descent	European descent	European descent
	Country	United States	UK	UK	USA	Croatia	Iceland	UK	UK	France	Sweden and Finland	UK	USA	The Netherlands, United Kingdom, Sweden	Finland	France, Germany, Italy, Netherlands, Spain, Sweden, UK	Germany	Germany	The Netherlands	UK	UK	UK	Germany	Netherlands	Scotland	UK, Sweden, Italy, Germany	Germany (West Pomerania)	Germany	Sweden	Netherlands	USA	Finland	USA	USA	Spain	Netherlands	Finland	Finland	Finland	Germany	Scotland UK	UK	UK	UK	France, Germany, Italy, Netherlands, Spain, Sweden, UK	UK	Germany	Germany	Germany
	Study design	prospective cohort	Population-based	Population-based	Population-based	Population-based	Population-based	Population-based	Population-based	Population-based	Case-control	Population-based	Population-based	Population-based	Case-contol study, subset of a population-based cohort. Only controls in this study	case-cohort (results are from subcohort)	Population-based	Population-based	Population-based	Population-based	Population-based	samples selected from LOLIPOP cohort	Case-control	Population-based	Population-based	Case-control	Population-based	Population-based	Population based twin register	Adolescents - poopulation based	Population-based	Population-based	Population-based	Case-control	Population-based	CAD cases	Population-based	Clinical prevention trial for diabetes	Population-based, but case/control selected for Metabochip	At risk for diabetes	Population-based	Population-based	Population-based	Population-based	Case-cohort (results are from subcohort)	Population-based	Population-based	Population-based	Population-based
HbA1C measurements	Sample type	fasting blood	Citrated whole blood (non-fasting)	Citrated whole blood (non-fasting)	Whole blood (fasting)	Fasting blood in EDTA	Whole blood (fasting)	Non-fasting whole blood EDTA	Non-fasting whole blood EDTA	Fasting blood	Whole blood	Fasting whole blood (EDTA)	Fasting blood	Fasting Blood	Fasting blood	Erythrocyte fraction of samples	whole blood (non-fasting)	whole blood (non-fasting)	Fasting whole blood (EDTA)	Fasting whole blood (EDTA)	Fasting whole blood (EDTA)	Fasting whole blood (EDTA)	EDTA whole blood	Fasting blood	Fasting blood in EDTA	Fasting blood in EDTA	Non-fasting whole blood (EDTA)	75g OGTT (fasting, 30 min, 120 min), EDTA blood	Whole blood (EDTA)	Fasting blood (EDTA)	Packed red blood cells (EDTA)	Fasting EDTA blood	EDTA-whole blood	Fasting blood	EDTA whole blood	Fasting blood	Fasting whole blood	Fasting whole blood	Fasting EDTA blood	Fasting whole blood (EDTA)	whole blood (EDTA)	Fasting whole blood (EDTA)	Non-fasting whole blood EDTA	Non-fasting whole blood EDTA	Erythrocyte fraction of samples	Fasting whole blood (EDTA)	whole blood (non-fasting)	whole blood (fasting)	Fasting whole blood (EDTA)
	Collection method	≥8 hr overnight fast	Not fasted	Not fasted	Overnight fast	Overnight fast blood samples immediatelly stored at -70C and then transported at -20C	Overnight fast	Stored in fridge until transported once a week for analysis.	Stored in fridge until transported once a week for analysis.	12h overnight fast	Overnight fast	Overnight fast, samples transported at ambient temperature and analysed the same day.	≥8 hr overnight fast	Overnight fast	Ovenight fast	Non-fasting venous sample	EDTA blood, samples stored at 4 - 6 degrees Celsius; transported at same temperature and analysed the same day.	EDTA blood, samples stored at 4 - 6 degrees Celsius; transported at same temperature and analysed the same day.	Fasting samples transported at ambient temperature and analysed the same day	Fasting samples transported at ambient temperature and analysed the same day	Fasting samples transported at ambient temperature and analysed the same day	Fasting samples transported at ambient temperature and analysed the same day	Fasting samples transported at ambient temperature and analysed the same day	Venous, processed same day < 5 hours	Fast from 10pm prev night, blood drawn in EDTA tube, between 8-9.30 am, taken to biochem lab w / in 2h	Clinic	non-fasting	Overnight fast, spinning within 1 hour after collection, then immediate quick-freeze on dry ice before transport, further storage in -80°C freezer	venous	Fasting samples transported in melting ice & delivered to laboratory within 4 hours	Freezer pack chilled morning fasting blood sample overnighted to central lab within 24-30 hours of venipuncture	12 hour fast	After measuring complete blood count, the EDTA tube was shipped to to the University of Missouri for analysis.	≥8 hr overnight fast	Fasting samples transported at ambient temperature and analysed the same day	Overnight fast	12 hour fast	12 hour fast	12 hour fast	Fasting samples transported at ambient temperature and analysed the same day	non fasting	Fasting samples transported at ambient temperature and analysed the same day	Stored in fridge until transported once a week for analysis.	Stored in fridge until transported once a week for analysis.	Non-fasting venous sample	Fasting samples transported at ambient temperature and analysed the same day	EDTA blood, samples stored at 4 - 6 degrees Celsius; transported at same temperature and analysed the same day.	EDTA blood, samples stored at 4 - 6 degrees Celsius; transported at same temperature and analysed the same day.	Fasting samples transported at ambient temperature and analysed the same day
	Type of assay	Frozen whole blood samples collected at ARIC Visit 2 (1990-1992) were thawed and assayed for hemoglobin A1c (HbA1c) in 2003-04 using a high performance liquid chromatography instrument (the Tosoh 2.2 Plus HPLC instrument) and the remaining specimens in 2007-08 using the Tosoh G7 instrument.	Ion-exchange HPLC by Tosoh A1c 2.2 Glycohemoglobin Analyser HLC-723GHb	Ion-exchange HPLC by Tosoh A1c 2.2 Glycohemoglobin Analyser HLC-723GHb	Ion-exchange HPLC by automated DiaSTAT analyzer (Bio-Rad Laboratories, Hercules, CA)	cation exchange method, with immunochemistry electrophoresis and affinity linking compatible with DCCT/UK PDS standard. Salzer laboratory, Zagreb Croatia	measured on a Hitachi 912 using reagents from Roche Diagnostics	HPLC	HPLC	high-performance liquid chromatography, using a L9100 automated ion-exchange analyzer (Hitachi/Merck-VWR). This assay was standardized to the National Glycohemoglobin Standardization Program	Different assays were performed by center: Finland - HPLC assay (Diamat,Hercules, CA,USA) Sweden - Variant II chromatographic method from Bio-Rad (CA,USA)	Clinical biochemistry, Addenbrookes hospital. HPLC Analyser: TOSOH G7 (Tosoh Bioscience Ltd, Worcestershire, UK)	Massachusetts General Hospital Diabetes Lab; HPLC after an overnight dialysis against normal saline; standardized against the glycosylated hemoglobin assay used in the Diabetes Control and Complications Trial; inter- and intra-assay CVs <2.5%.	Nycocard HbA1c, Axis-Shield, Oslo, Norway Swedish samples: The participants from all of Sweden were asked to make an appointment at their local health-care facility on Monday to Thursday mornings (not the day before a national holiday), to ensure that the samples would reach Karolinska in Stockholm by over-night mail. Blood was drawn by venipuncture. HbA1C was measured in whole blood by high perf…	Immunoturbidometrically using Architect ci8200-analyzer (Abbott Laboratories, Abbott Park, Illinois, U.S.A.)	Ion exchange high-performance liquid chromatography	turbidimetric immunologic inhibition assay (TINIA; HA1C Kit Dade Behring)	S4: turbidimetric immunologic inhibition assay (TINA-quant Hemoglobin A1c II; Roche Diagnostics) ; F4: HPLC (Menarini HA-8140)	Laboratory Center UMCG, Integra, Tinaquant Turbidimetric inhibition immunoassay	non-enzymatic method	non-enzymatic method	non-enzymatic method	Haemoglobin A1c UNI-MATE 5 Immunoassay	Nycocard HbA1c	Balfour Hospital Laboratory, Kirkwall, Orkney. Beckman Synchron system. Colorimetric assay of haemoglobin in haemolysate. Turbidimetric immuno-inhibition assay of Haemoglbin A1c in haemolysate. Standardised against DCCT	Central Laboratory of the University Hospital, Münster, Germany:HbA1c was measured by HPLC on a Merck-Hitachi L-9100 automated HPLC system. Reference material was obtained from the national German INSTAND proficiency testing program. Inter- and intra-assay CVs were <2.5%.	HPLC micro column photometric measurement automatic calculation	HPLC (Bio-Rad) from EDTA blood Bio-Rad Variant II HbA1C analyzer VARIANT II™ HbA1c Program is totally-automated	HPLC	High-performance liquid chromatography, Variant	Tina-Quant turbidimetric inhibition immunoassay on Hitachi 911 autoanalyzer	HPLC (Laboratory: Kuopio University Hospital, ISLAB) Reagents: Tosoh G7 glycohemoglobin analyser, Instrumentation: Tosoh Bioscience, Inc. San Francisco, CA, USA Certified by NGSP. The calibration is traceable to DCCT.	HPLC	Massachusetts General Hospital Diabetes Lab; HPLC after an overnight dialysis against normal saline; standardized against the glycosylated hemoglobin assay used in the Diabetes Control and Complications Trial; inter- and intra-assay CVs <2.5%.	HPLC assay	HPLC	immunoturbidimetric method	Bayer DCA 2000 Analyzer (Bayer Corporation, Indiana, USA)	HPLC (Laboratory: Kuopio University Hospital, ISLAB) Reagents: Tosoh G7 glycohemoglobin analyser, Instrumentation: Tosoh Bioscience, Inc. San Francisco, CA, USA Certified by NGSP. The calibration is traceable to DCCT.	Ionexchange HPLC	Menarini Diagnostics HA-8160 Evolution HPLC analyser	Clinical biochemistry, Addenbrookes hospital	HPLC	HPLC	Ion exchange high-performance liquid chromatography	Clinical biochemistry, Addenbrookes hospital	turbidimetric immunologic inhibition assay (TINIA; HA1C Kit Dade Behring)	S4: turbidimetric immunologic inhibition assay (TINA-quant Hemoglobin A1c II; Roche Diagnostics) ; F4: HPLC (Menarini HA-8140)	Institute of Laboratory Medicine, University of Leipzig; assay: A1C-2 Tina-quant Hemoglobin A1c Gen.2; measured on COBAS 6000 analyzer
	Manufacturer	Tosoh Bioscience, South San Francisco, CA, USA	Tosoh Bioscience, South San Francisco, CA, USA		BioRad	Beckman	Roche Diagnostics	Bio-Rad Diomat	Bio-Rad Diomat	Hitachi / Merck-VWR	Diamat,Hercules, CA,USA or Bio-Rad, CA,USA	HPLC Analyser: Tosoh (Tosoh Corp, Tokyo, Japan)	NA	-		Tosoh	Dade Behring	Roche, Menarini	Roche Diagnostics Nederland BV, Almere, the Netherlands	Toshoh, Tokyo, Japan	Toshoh, Tokyo, Japan	Toshoh, Tokyo, Japan	Hoffmann-La Roche AG, Grenzach-Whylen, Germany	Axis-Shield, Oslo, Norway	Beckman	Merck-Hitachi L-9100	Diamat(Biorad)	Bio-Rad	-	Bio-Rad	Roche Diagnostics, Indianapolis, Ind, USA	Tosoh Bioscience, Inc. San Francisco, CA, USA	Bio-Rad DIAMAT glycosylated hemoglobin analyzer system	-	HPLC TosohR G8	Tosoh-G8 machine (Tosoh, Japan)	Abbott Laboratories, Abbott Park, IL, USA	Bayer Corporation, Indiana, USA)	Tosoh Bioscience, Inc. San Francisco, CA, USA	Variant II Hemoglobin Testing system Analyzer, BioRad Lab Incorporation, Hercules, CA, USA	HPLC Analyser: Tosoh (Tosoh Corp, Tokyo, Japan)	HPLC Analyser: Tosoh G7 (Tosoh Corp, Tokyo, Japan)	Bio-Rad Diomat	Bio-Rad Diomat	Tosoh	HPLC Analyser: Tosoh (Tosoh Corp, Tokyo, Japan)	Dade Behring	Roche, Menarini	Roche
	Standardization (if any)	Adjusted nominal values for calibrators to long-term quality control samples	NA		NA	DCCT	NA	Assay reports NGSP % values; calibration anchored to the IFCC calibrator	Assay reports NGSP % values; calibration anchored to the IFCC calibrator	This assay was standardized to the National Glycohemoglobin Standardization Program	Finnish NGSP (%) = 0,956 x HbA1c,Sweden(%) + 1,18	Assay reports NGSP % values; calibration anchored to the IFCC calibrator	NA	Assay reports DCCT/NGSP % values of HbA1c		Dutch Foundation for Quality Assessment in Medical Laboratories (SKML) calibrators	DCCT	DCCT	Assay reports NGSP % values; calibration anchored to the IFCC calibrator	Yes	Yes	Yes	NA	Assay reports DCCT/NGSP % values of HbA1c	DCCT	DCCT	NA	NA	-		NA	NA	Standardized against the glycosylated hemoglobin assay used in the Diabetes Control and Complications Trial; inter- and intra-assay CVs <2.0%.	NA	NGSP (%)=0,915XIFCC %+2,15		innish Accreditation Service (FINAS, Helsinki), standard SFS-EN ISO/IEC 17025:2005	-	NA	All the HbA1c were performed in a centralized laboratory at the Technical University Dresden with a assay CV from 2.4%.	calbrated against IFCC statndard	Assay reports NGSP % values; calibration anchored to the IFCC calibrator	Assay reports NGSP % values; calibration anchored to the IFCC calibrator	Assay reports NGSP % values; calibration anchored to the IFCC calibrator	Dutch Foundation for Quality Assessment in Medical Laboratories (SKML) calibrators	Assay reports NGSP % values; calibration anchored to the IFCC calibrator	DCCT	DCCT	Assay reports DCCT/NGSP % values of HbA1c
	Was the lab that performed the assay NGSP aligned?	Yes	NA		Yes	No, NGSP certification didn't exist at this time	No	Yes	Yes	Yes	-	Yes	Yes	Yes	-	Yes	Yes	Yes	Assay reports NGSP % values; calibration anchored to the IFCC calibrator	Yes	Yes	Yes	N/A (assays were performed in the Clinical Chemistry Laboratory of the Ludwigshafen Hospital)	Yes	No, NGSP certification didn't exist at this time	No, NGSP certification didn't exist at this time	NA	NA	-	Yes	Reports NGSP % values; Assay is standardized against the IFCC reference method	Yes	Yes	Yes	Yes		Yes	No, NGSP did not exist at that time	Yes	The HbA1c in this study was done following the old standard after DCCT/DGSD and will be given in a percentage value. This old HbA1c standard can be translated into the IFCC standard following the formula [HbA1c [IFCC] [mmol/mol] = (HbA1c [%] – 2,15) × 10,929].	Yes	Yes	Yes	Yes	Yes	Yes	Yes	Yes	Yes
	Reference (PMID)	20923494	Protocol accessible at http://www.b58cgene.sgul.ac.uk/hba1c_g5.pdf	Strachan DP, et al. Lifecourse influences on health among British adults: Effects of region of residence in childhood and adulthood. Int. J. Epidemiol. 2007;36:522-531.	NA	-	-	-	-	16801588	17463246	-	9518396	-	-		26473975	21091229, 26155746	23121487	21909115	18940312, 20549180	18193046	-	20477721	-	-	-	-	-		NA	15285181	http://www.cdc.gov/nchs/data/nhanes/nhanes3/cdrom/nchs/manuals/labman.pdf	-	-	-	-	-	15285181	http://www.ncbi.nlm.nih.gov/pubmed?term=schwarz%20Abdul-ghani	-	-	-	-	-	-	26473975	21091229, 26155746	-
	Date of (HbA1c) sample collection	1990-1992	-	-	2001-2008	2003-2004	2005	1995-1998	1995-1998	1994 - 1996	1990 - 2006	2005-2010 (only used Fenland Affy5.0 and metabochip data, so those samples were collected before 2010)	1991-1995	2004 to 2008	2000-2001	1991-1998	2004-2005	1999-2001	27/11/2006 – 01/03/2010	2003-2008	2003-2008	2003-2008	1997-2000	2004-2008	2005-2011	~1998-2000	1997-2001	2005-2007	2004-2008	2005-2007	1992-1994	2007-2008	1991-1994	-	2000-2003	-	2007	1993-1998	2005-2009	2002-2009	2004-2008	2000-2003	1995-1998	1995-1998	1991-1998	2005-2010 (only used Fenland Affy5.0 and metabochip data, so those samples were collected before 2010)	2004-2005	2006-2008	-
	Was HbA1c measured before 2010?	Yes	Yes	Yes	Yes	Yes	Yes	Yes	Yes	Yes	Yes	Yes	Yes	Yes	Yes (2008)	Yes	Yes	Yes	6827 samples yes; 734 samples no	Yes	Yes	Yes	Yes	Yes	Mostly	Yes	Yes	Yes	Yes	Yes	Yes	Yes	Yes	Yes	Yes	Yes	Yes	Yes	Yes	Yes	Yes	Yes	Yes	Yes	Yes	Yes	Yes	Yes	Yes
PARTICIPANTS	Exclusions	Non-fasting (< 8 hr), self-reported physician diagnosis of diabetes, diabetes medication, FG > 7 mmol/l	Known diabetes patients	Known diabetes patients	Diabetes	Diabetes, FG ≥ 7 mmol/l	Diabetes diagnosis	Diabetes cases	Diabetes cases	Diabetes, FG ≥ 7 mmol/l	Diabetes, FG ≥ 7 mmol/l	Diabetes, FG ≥ 7 mmol/l or 2hGlu>11.1, or missing values	diabetes medication, FG ≥ 7 mmol/l	FG > 7.00 and known diabetes.		Incident cases excluded	reported diabetes, HbA1c > = 6.5	Diabetes, FG ≥ 7 mmol/l, HbA1c >6.5	Diabetes, FG ≥ 7 mmol/l	Diabetes, FG ≥ 7 mmol/l	Diabetes, FG ≥ 7 mmol/l	Diabetes, FG ≥ 7 mmol/l	Diabetes, FG ≥ 7 mmol/l, recent surgery, no genotypic data	FG > 7.00 and known diabetes.	pregnancy, diabetes	Diabetics, FG> 7 mmol/l	Diabetes diagnosis or treatment, gluc >= 7 mmol/l	Diabetes diagnosis or treatment, gluc >= 7 mmol/l	Diabetes, FG ≥ 7 mmol/l	Diabetes diagnosis or treatment	Diabetes, HbA1c>=6.5%	Known T2D or Fasting glucose > 7 mM or on metab. medication or no HbA1c or BMI value	Diabetes, FG ≥ 7 mmol/l	Diabetes	Diabetes, FG ≥ 7 mmol/l	Diabetes, FG ≥ 7 mmol/l, hospitalization in the previous 2-3 months prior to blood sampling	Known T2D or Fasting glucose > 7 mM or on metab. medication or no HbA1c or BMI value	Known T2D or Fasting glucose > 7 mM or on metab. medication or no HbA1c value	Known T2D or Fasting glucose > 7 mM or on metab. medication or no HbA1c or BMI value	Known T2D or Fasting glucose > 7 mM or on metab. medication or no HbA1c or covariate values	Diabetes, FG ≥ 7 mmol/l, non-fasting	Diabetes, FG ≥ 7 mmol/l	Diabetes cases	Diabetes cases	-	Diabetes, FG ≥ 7 mmol/l	reported diabetes, HbA1c > = 6.5	Diabetes, FG ≥ 7 mmol/l, HbA1c >6.5	Known T2D, FG ≥ 7mmol/l
	Participants with HBA1C N all (% males / % females)	6777 (45.8% / 54.2%)	2501 (48.7% / 51.3%)	2732 (51% / 49%)	490 (51.6, 48.4)	720 (41.2/58.8)	345 (50/50)	468 (39.1/60.9)	940 (40.4/59.6)	716 (25 / 75)	463 (44.0/56.0)	1358 (44.2/55.8)	1996 (44.4/55.6)	568 (0 / 100)		4314 (35.1 / 65.0)	1462 (48/51)	1736 (48/51)	7561 (42.4/57.6)	843 (27.76 / 72.24)	501 (13.57 / 86.43)	541 (100/0)	1740 (70.0 / 30.0)	1452 (35 / 65)	706 (46.36/53.64)	831 (82.7 / 17.3)	3538 (47.9 / 52.1)	705 (59.7 / 40.3)	9646 ( 45.9 / 54.1)	1063 (47.8/52.2)	22453 (0/100)	1456 (100/0)	1214 (38.6/61.4)	648 (44.9/55.1)	583 (47/53)	223 (78/22)	2141 (46.0 / 54.0)	379 (30.08 / 69.92)	663 (100 / 0)	1068 (43.1 / 56.9)	1782 (50.5/49.5)	1549 (45.8/54.2)	658 (65.3/34.7)	1074 (55.4/44.5)	5488 (34.1/65.9)	3146 (46.7/53.3)	2888 (48/52)	2596 (47/53)	430 (35/65)
	Age [Mean (SD) men / Mean (SD) women], years	57.4 (5.7) / 56.7 (5.6)	-	NA	71.89(13.98)/67.43(15.4)	54.28(14.99)/55.07(15.87)	66.1 (14.4) / 63.8 (16.0)	58.3 (9.2) / 57.6 (8.8)	58.5 (9.4) / 58.1 (9.1)	52.65 (5.56) / 48.8 (8.71)	59.4 (11.0) / 59.4 (10.7)	44.4 (7.3) / 45.5 (7.2)	54.7 (9.9) / 54.1 (9.9)	- / 55.1 (21.8)		52.2 (9.2) / 51.6 (9.7)	62.3 (10.2) / 61.6 (10.1)	53.9 (8.9) / 53.4 (8.8)	47.9 (11.2) / 47.5 (10.9)	55.61 (9.84) / 55.42 (9.65)	53.61 (10.14) / 53.63 (12.36)	55.23 (9.39)	59.9 (11.3) / 63.3 (10.8)	47.7 (14.4) / 43.3 (13.7)	54.23(15.68)/53.01(15.74)	60.47 (6.681)/ 62.81 (6.293)	49.0 (16.4) / 47.1 (15.6)	46.44 (15.58) / 47.16 (16.10)	65.2 (8.1) / 64.1 (8.1)	16.2 (0.6) / 16.2 (0.7)	0(0) / 54.1 (7.1)	57.6 (7.6) / NA	52.82 (20.22) / 52.69 (20.27)	52.7 (12.9) / 52.5 (12.7)	53(12)/55(12)	40.78(6.19)/40.28(7.27)	59.55 (8.45) / 58.75 (8.20)	56.49 (7.12) / 54.97 (7.29)	53.07 (5.36) / n.a.	62.60 (14.44) / 62.08 (15.63)	60.6 (11.1) / 57.6 (11.4)	61.4(9.2) / 60.8 (9.2)	63.7 (8.5) / 66.4 (7.5)	62.1 (9.2) / 61.5 (9.9)	51.6 (9.8) / 51.6 (9.7)	46.9 (7.2) / 46.9 (7.0)	56.79 (13.06) / 56.32 (12.57)	54.91 (13.13) / 54.54 (12.86)	46 (15.5) / 44.9 (15.9)
	BMI [Mean (SD) men / Mean (SD) women], kg / m2	27.3 (3.9) / 26.6 (5.3)	27.90 (4.09) / 26.77 (5.39)	27.78 (4.26) / 26.77 (5.45)	27.00(3.95)/25.72(4.84)	27.31(3.66)/26.95(4.62)	28.2 (4.0) / 28.0 (4.9)	32.19 (2.01) / 33.37 (3.07)	26.35 (3.2) / 25.81 (4.2)	23.14 (1.17) / 21.33 (1.85)	26.5 (3.1) / 26.3 (4.4)	27.5 (3.9) / 26.6 (5.4)	27.9 (3.9)/26.1 (5.0)	- / 24.6 (4.2)		26.8 (3.7) / 25.8 (4.7)	27.89 (3.49) / 27.70 (4.95)	27.91 (3.87) / 27.25 (4.89)	26.5 (3.6) / 25.8 (4.6)	27.43 (4.15) / 26.44 (5.13)	27.67 (4.00) / 28.25 (5.60)	28.04 (4.97)	27.1 (3.6) / 26.5 (4.3)	25.6 (3.3) / 24.6 (4.0)	28.08 (4.32)/27.45 (5.26)	27.655 (3.577)/ 28.112 (4.98)	27.3 (3.9) / 26.6 (5.2)	26.47 (5.38) / 26.84 (3.50)	26.0 (3.5) / 25.5 (4.2)	20.9 (3.4) / 21.6 (3.0)	0 (0) / 25.8 (4.8)	26.7 (3.8) / NA	27.08 (4.82) / 26.64 (5.95)	27.8 (5.2) / 27.1 (7.3)	27.35(3.15)/27.41 (4.68)	26.85(3.74)/25.92(5.11)	26.78 (3.73) / 26.97 (4.95)	29.51 (3.48) / 31.75 (4.96)	26.35 (3.30) / n.a.	26.86 (3.43) / 26.99 (5.05)	27.4 (4.1) / 26.7 (5.3)	27.3 (4.0) / 27.2 (5.3)	26.9 (3.2) / 26.8 (4.2)	26.8 (3.2) / 26.4 (4.1)	26.4 (3.6) / 25.5 (4.4)	27.0 (4.1) / 26.4 (5.4)	27.55 (4.36) / 26.73 (5.71)	27.49 (4.19) / 26.85 (5.05)	37.77 (11.4) / 37.55 (12.1)
	Fasting plasma glucose [Mean (SD) men / Mean (SD) women], mmol/l	5.8 (0.5) / 5.5 (0.5)	NA	NA	5.22(0.56)/4.95(0.48)	5.37(0.66)/5.27(0.67)	5.92 (0.55)/5.53 (0.71)	-	-	5.12 (0.32) / 5.01 (0.38)	5.52 (0.52) / 5.39 (0.45)	5.0 (0.47) / 4.7 (0.47)	5.36 (0.48) / 5.14 (0.49)	- / 5.2 (0.55)		5.22 (1.7) / 4.83 (1.22)	n/a	_	5.11 (0.49) / 4.87 (0.49)	5.19 (0.51) / 5.03 (0.47)	5.15 (0.55) / 5.02 (0.42)	5.22 (0.59)	5.48 (0.57) / 5.39 (0.56)	5.5 (0.51) / 5.3 (0.51)	5.66 (1.13)/5.24 (0.77)	5.57 (0.56)/ 5.41 (0.568)	non-fasting 5.4 (0.65) / 5.1 (0.65)	5.72 (1.92) / 5.45 (0.48)	5.41 (0.56) / 5.23 (0.53)	4.59 (0.39) / 4.47 (0.38)	NA	5.84 (0.47) / NA	5.72 (1.36) / 5.40 (1.35)	4.97 (0.47) / 4.76 (0.49)	4.87 (0.70)/4.68(0.75)	5.30(0.59)/5.05(0.59)	6.04 (0.43) / 5.79 (0.46)	5.97 (0.53) / 5.93 (0.57)	5.76 (0.44) / n.a.	5.55 (0.61) / 5.33 (0.61)	4.93 (0.44) / 4.78 (0.43)	5.13 (0.56) / 4.90 (0.54)	-	-	5.08 (1.51) / 4.72 (1.26)	4.93 (0.47) / 4.64 (0.46)	n/a	5.37 (0.50) / 5.08 (0.51)	5.27 (0.62) / 5.29 (0.49)
	HbA1c [Mean (SD) men / Mean (SD) women], %	5.4 (0.4) / 5.4 (0.4)	5.21 (0.40) / 5.1 1 (0.44)	5.37 (0.83) / 5.20 (0.60)	5.44(0.53)/5.45(0.45)	5.22(0.47)/5.34(0.67)	5.80 (0.95) / 5.77 (1.25)	5.28 (0.65) / 5.28 (0.58)	5.22 (0.60) / 5.17 (0.58)	5.25 (0.38) / 5.16 (0.38)	5.59 (0.42) / 5.49 (0.44)	5.4 (0.36) / 5.4 (0.37)	5.24 (0.61) / 5.25 (0.62)	- / 5.11 (0.69)		5.51 (0.50) / 5.48 (0.48)	5.30 (0.38) / 5.33 (0.31)	5.57 (0.46) / 5.59 (0.45)	5.52 (0.34) / 5.48 (0.34)	5.29 (0.42) / 5.37 (0.37)	4.97 (0.55) / 5.45 (0.38)	5.05 (0.54)	5.67 (0.44) / 5.74 (0.43)	5.3 (0.46) / 5.3 (0.45)	5.50 (0.73)/ 5.46 (0.70)	5.98 (1.07)/ 6.172 (1.10)	5.3 (0.58) / 5.2 (0.57)	5.35 (0.38) / 5.35 (0.37)	4.65 (0.33) / 4.67 (0.31)	5.22 (0.46) / 5.13 (0.41)	0 (0) / 5.0 (0.3)	5.56 (0.33) / NA	5.54 (0.88) / 5.39 (0.72)	5.49 (0.48) / 5.47 (0.45)	5.17(0.49)/5.17 (0.45)	5.47(0.45)/5.31(0.49)	5.34 (0.36) / 5.24 (0.37)	5.56 (0.43) / 5.93 (0.57)	5.56 (0.30) / n.a.	5.65 (0.87) / 5.53 (0.65)	5.49 (0.29)/5.45 (0.30)	5.37 (0.43) / 5.34 (0.45)	5.40 (0.66) / 5.48 (0.59)	5.35 (0.55) / 5.34 (0.56)	5.46 (0.47) / 5.45 (0.46)	5.57 (0.50) / 5.51 (0.38)	5.26 (0.29) / 5.28 (0.30)	5.42 (0.32) / 5.40 (0.33)	5.55 (0.41) / 5.54 (0.35)
	HbA1c [Mean (SD)], % (combined men & women)	5.4 (0.4)	5.16 (0.43)	5.29 (0.73)	5.44(0.495)	5.29(0.596)	5.79 (1.12)	5.28 (0.61)	5.19 (0.58)	5.18 (0.38)	5.54 (0.43)	5.4 (0.36)	5.24 (0.61)	5.11 (0.69)		5.49 (0.49)	5.32 (0.35)	5.58 (0.46)	5.49 (0.34)	5.31 (0.41)	5.03 (0.56)	5.05 (0.54)	5.69 (0.44)	5.3 (0.45)	5.48 (0.71)	6.04 (1.16)	5.3 (0.58)	5.35 (0.38)	4.66 (0.32)	5.18 (0.44)	5.0 (0.3)	5.56 (0.33)	5.45 (0.79)	-	5.17 (0.47)	5.44(0.46)	5.29 (0.37)	5.57 (0.53)	5.56 (0.30)	5.59 (0.75)	5.47(029)	5.35 (0.44)	5.43 (0.64)	5.34 (0.56)	5.45 (0.46)	5.54(0.44)	5.27 (0.30)	5.41 (0.33)	5.77 (0.71)
	HbA1c [Median / Min / Max], % (combined men & women)	5.4/3.5/10.4	5.10 / 3.30 / 11.50	5.20 / 3.80 / 6.5	5.4/4/7.1	5.3/3.0/11	5.6 (3.6-12.1)	5.30 / 3.20 / 8.30	5.20 / 2.80 / 8.60	5.2 / 3.9 / 6.2	5.58 / 3.6 / 6.81	5.4 / 3.5 / 7.4	5.2 / 3.07 / 10.4	5.0 / 3.6 / 10.8		5.44 / 3.98 / 13.59	5.3/4.3/11.3	5.6/4.2/11.9	5.50 / 3.60 / 7.80	5.30 / 3.70 / 6.90	5.10 / 3.60 / 7.00	5.10 / 3.00 / 7.40	5.70 / 3.10 / 6.40	5.3 / 3.0 / 7.8	5.40/4.10/11.00	5.76 / 3 / 16.44	5.2 / 1.7 / 8.8	5.30 / 4.00 / 6.70	4.6 / 2.8 / 6.7	5.2 / 3.2 /7.0	4.98 / 2.27 / 6.499	5.6 / 4.2 / 6.8	Median = 5.2 (min and max restricted)	-	5.17/3.7/7.0	5.40/4.10/7.20	5.3 / 3.8 / 6.8	5.5 / 3.6 / 8.0	5.6 / 4.4 / 6.6	5.5 / 2.7 / 11.4	5.5/4.3/6.1	5.3 / 3.8 / 9	5.40 / 3.20 / 13.40	5.40 / 3.20 / 9.50	5.44 / 3.25 / 12.86	5.5/3.5/18.9	5.2 /4.3/6.4	5.40 / 3.70 / 6.40	5.60/4.40/10.50
	HbA1c [10% / 25% / 75% / 90%iles], % (combined men & women)	5.0/5.2/5.6/5.8	4.7/4.9/5.4/5.6	4.3 / 5.0 / 5.4 / 6.2	4.8/5.1/5.8/6.1	4.8/5.0/5.5	4.8/5.2/6.1/6.7	4.60 / 4.90 / 5.60 / 6.00	4.40 / 4.80 / 5.60 / 5.90	4.7 / 5.0 / 5.4 / 5.7	5.0 / 5.3 / 5.8 / 6.0	5/5.2/5.6/5.8	4.58 /4.88 /5.54 /5.89	4.5 / 4.7 / 5.3 / 5.8		4.98 / 5.26 / 5.72 / 5.99	5.0/5.1/5.5/5.7	5.1/5,.3/5.8/6.0	5.10 / 5.30 / 5.70 / 5.90	4.80 / 5.10 / 5.60 / 5.80	4.30 / 4.60 / 5.03 / 5.70	4.40 / 4.70 / 5.40 / 5.80	5.10 / 5.40 / 6.00 / 6.30	4.7 / 5.0 / 5.5 / 5.9	4.90/ 5.10/ 5.70/ 6.00	5.04 / 5.4 / 6.36 / 7.44	4.5 / 4.9 / 5.6 / 6.0	4.9/5.1/5.6/5.8	4.3 /4.5 / 4.8 /5.1	4.6 / 4.9 / 5.5 / 5.7	4.70/ 4.83 / 5.16 / 5.35	5.2 / 5.4 / 5.8 / 6.0	4.7 / 4.9 / 5.6 / 5.9	-	4.60/4.90/5.40/5.70	4.9/5.2/5.7/6.1	4.8 / 5.0 / 5.5 / 5.8	5.0 / 5.3 / 5.8 / 6.2	5.2 / 5.4 / 5.7 / 5.9	4.9 / 5.2 / 5.8 / 6.2	5.1/5.3/5.7/5.8	4.8/5.1/5.6/5.9	4.80 / 5.10 / 5.80 / 6.10	4.60 / 3.60 / 6.90 / 6.00	4.99 / 5.17 / 5.63 / 5.90	5.1/5.3/5.8/6	4.9 / 5.1 / 5.5 / 5.6	5.00 / 5.20 / 5.60 / 5.80	5.2/5.3/5.9/6.5
GENOTYPING	Genotyping centre	Broad Institute	Illumina	Wellcome Trust Sanger Institute	NIA	Edinburgh WTCCC	deCode Genetics	Wellcome Trust Sanger Institute	Wellcome Trust Sanger Institute	Genome Quebec Innovation Centre, Montreal, Canada CNRS-UMR8090, Lille, France	Broad Institute	Affymetrix	Affymetrix	Finnish Genome Center in Helsinki & Uppsala University Sweden	Wellcome Trust Sanger Institute	Wellcome Trust Sanger Institute	Genome Analysis Center (GAC) Helmholtz-Zentum München	Genome Analysis Center (GAC) Helmholtz-Zentum München	University Medical Center Groningen	DeCode	GSK	Perlegen	LURIC Study gGmbH, Eppelheim, Germany	Perlegen / GAIN	Munich GSF	CNG Uppsala	Affymetrix	Microarray Core Facility of the Interdisciplinary Centre for Clinical Research, University of Leipzig, Germany and ATLAS Biolabs GmbH, Berlin, Germany	Uppsala SNP Technology Platform, Uppsala University Hospital, Sweden	University Medical Center Groningen	Illumina	NHGRI	Broad Institute	Broad Institute	Diabetes and Lipids Research Laboratory	Wellcome Trust Sanger Institute	Center for Inherited Disease Research, Johns Hopkins University	Center for Inherited Disease Research, Johns Hopkins University	Center for Inherited Disease Research, Johns Hopkins University	Center for Inherited Disease Research, Johns Hopkins University	Wellcome Trust Sanger Institute	Cambridge Genomic Services, Department of Pathology, University of Cambridge, UK	Cambridge Genomic Services, Department of Pathology, University of Cambridge, UK	Cambridge Genomic Services, Department of Pathology, University of Cambridge, UK	Cambridge Genomic Services, Department of Pathology, University of Cambridge, UK	Cambridge Genomic Services, Department of Pathology, University of Cambridge, UK	Genome Analysis Center (GAC) Helmholtz-Zentum München	Genome Analysis Center (GAC) Helmholtz-Zentum München	Wellcome Trust Sanger Institute
	Genotyping Array	Affymetrix SNP 6.0	Illumina Human Hap 550	Illumina 1M	Illumina550K	Illumina Hap300	Human Hap300 and Human Hap300-duo+ Bead Arrays, Illumina,	Affymetrix 500K	Affymetrix 500K	Illumina 100K, 300K, 370 duo	Affymetrix 500K Array Set	Affymetrix 500K Array Set	Affymetrix 500K and MIPS 50K	Illumina II 300K	Illumina HumanHap 610	Illumina 660w quad chip	Affymetrix 500K Array Set	Affymetrix 6.0	Illumina Cyto SNP12 v2	Illumina Human610	Affymetrix 500K Array	Perlegen Custom Array	Affymetrix 6.0	Affymetrix-Perlegen	Illumina Hap300, subset on CNV370, called with Hap300 files	Illumina Human1M	Affymetrix SNP 6.0 Array	500K Affymetrix GeneChip (250K Sty and 250K Nsp arrays, Affymetrix, Inc) and Affymetrix Genome-Wide Human SNP Array 6.0	Illumina BeadStation 500GX	Illumina Cyto SNP12 v2	Illumina Human Hap Duo +	iPLEX Sequenom MassARRAY	Sequenom iPLEX	Sequenom iPLEX	TaqMan SNP genotyping assay (Applied Biosystems)	Illumina Metabochip	Illumina Metabochip	Illumina Metabochip	Illumina Metabochip	Illumina Metabochip	Illumina Metabochip	Illumina Metabochip	Illumina Metabochip	Illumina Metabochip	Illumina Metabochip plus	Illumina Metabochip	Illumina Metabochip	Illumina Metabochip	Illumina Metabochip
	Genotyping calling algorithm	Birdseed	Illuminus	Illuminus	Beadstudio	Beadstudio using Hap300v2 cluster file	Beadstudio	BRLMM	BRLMM	BeadStudio (v3.3.7 in Lille, v2.0 in Canada) calling by using the manufacturer’s default cluster settings	BRLMM	BRLMM	BRLMM	Beadstudio 2.0	Illuminus	Illuminus	BRLMM	Birdseed2	GenomeStudio	BeadStudio	BRLMM	Custom	Birdseed v2	Perlegen's proprietary genotype calling algorithm	Beadstudio using Hap300v2 cluster file	Beadstudio	Birdseed V2	BRLMM algorithm (Affymetrix, Inc) for 500K and Birdseed Algorithm for Genome-Wide Human SNP Array 6.0	Illumina GenCall	GenomeStudio	BeadStudio v. 3.3	Sequenom MassArray Typer 3.4	Sequenom	Sequenom		GenoSNP	BeadStudio version 3.3.7, Gentrain version 1.0	BeadStudio version 3.3.7, Gentrain version 1.0	BeadStudio version 3.3.7, Gentrain version 1.0	BeadStudio version 3.3.7, Gentrain version 1.0	GenCall	GenCall	GenCall	GenCall	GenCall	GenCall	GenCall	GenCall	GenCall
SAMPLE QC	Sample call rate [filter detail / N individuals excluded]	0.95/0	>=98%	0.95	>98.5 % / 9	0.95/0	≥95% / 472	>=94% / 90	>=94% / 90	95%/15	≥ 95% [exclude if <95%/ None]	95% / 1	97% / 102	0.95 / 28	0.95/7	≥95%	-	-	≥ 95% [exclude if <95%]	≥ 90%	≥ 95%	≥ 95%	≥ 95% [exclude if <95%]	99.2% / 8	0.98	0.95	0.92	>0.94	>=97% (exclude if <97%) / 10	≥ 95% [exclude if <95%]	≥ 98% [exclude if <98%]	0.9	99.7% (96% / 14)	99.7% (96% / 14)	≥ 95% [exclude if <95%]	≥ 95% [exclude if <95%/ 9]	Minimum call rate was 98.15%	Minimum call rate was 98.15%	Minimum call rate was 98.15%	Minimum call rate was 98.15%	≥ 95%	≥ 95% [exclude if <95%/ 0]	≥ 95% [exclude if <95%/ 39]	≥ 95% [exclude if <95%/ 5]	≥ 95%	≥ 95% [exclude if <95%/ 22]	≥ 95% [exclude if <95%/ 0]	≥ 95% [exclude if <95%/ 0]	<95% / 2
	Heterozygosity [filter detail / N individuals excluded]	-	NA	NA	-	FDR<1%/0	-	<23% or >30%: n=20	<23% or >30%: n=20	-	-	Heterozygosity upperbound 0.28822 lowerbound 0.27348 / 87	5 SD from mean (< 25.758% or > 29.958%) / 16	-	-	autosomal heterozygosity min = 0.3020, max = 0.3215	-	-	none	n.a.	n.a.	n.a.	none	-	FDR<1%	-	-	-	49	Heterozygosity [>3SD from mean]	NA	NA	NA	NA	none	[10]	not applied	not applied	not applied	not applied	applied [/N=10 ]	not applied	not applied	not applied	autosomal heterozygosity min = 0.1825, max = 0.2025	not applied	n.a.	n.a.	2
	Other exclusions [N]	Gender mismatch: X / Y checks / 32; Inferred 1st degree relatives / 83; Mismatch of 10 or more SNPs with SNPs previously genotyped on other platforms / 297; Genetic outlier as assessed by Identity by State (IBS) using PLINK and >8 SD along any of the first 10 principal components in EIGENSTRAT with 5 iterations / 331	NA	Gender mismatch and relatedness	Ethnic outliers; duplicates; gender mismatch	Ethnic outliers; duplicates; gender mismatch; excess IBS incompatible with pedigree	-	Relatedness, n=4, duplicate n=1	Relatedness, n=4, duplicate n=1	-	Related individuals [41], gender check	Failed relatedness and duplicate check / 43	> 1000 Mendelian errors (1)	-	Unspecified Sex: 1 individual; Related individuals PI_HAT>0.2: 13 individuals; Contamination: 3 individuals; MDS-plot outliers: 14 individuals; Excess Fst: 4 individuals	ethnic outliers;duplicates and relatedness check;Sex mismatch check;check; sequenom identity fail;missing data, * Intensity outlier chips were failed by the genotyping centre.	-	-	non-Caucasian (Principle Components Analysis); relatedness: pi-hat > 0.4; gender mismatch	n.a.	n.a.	n.a.	duplicates/relatedness, gender mismatch	Contamination (< 0.74 IBS (1)); relatedness (IBS > 828 (38)); second or first degree relatives; gender mismatch (2)	Ethnic outliers; duplicates; gender mismatch; excess IBS incompatible with pedigree	Ethnic outliers	-	Ethnic outliers; duplicates; gender mismatch; IBS>0.2	none	Duplicate and MZ samples, sex mismatch, non-caucasians	NA	NA		-	none	Ethnic outliers [121]	Gender discrepant or unexpected duplicate or no phenotype	Gender discrepant or unexpected duplicate or no phenotype	Gender discrepant or unexpected duplicate or no phenotype	Gender discrepant or unexpected duplicate or no phenotype	gender discrepant, unexpected duplicates, MDS outliers [35]	No phenotype [2]	Sex mismatch [1]	Sex mismatch [1]	ethnic outliers; duplicates and relatedness check ; sex mismatch (X heterozygosity); concordance with candidate genotyping;	Sex mismatch [8]	_	_	Ethnic outliers (6) / gender discordance (36)
	Individuals for analysis	6777	2501	2732	857	720	6240			716	463	1378	1996	568	1205	4956	1462	1735	7561	843	501	541	1740	1452	719	830	3538	705	9554	1354	22453	1456	1214	1736	583	223	663	663	663	663	3708	1602	1489	1694		3187	2888	2596	924
SNP QC	MAF [filter detail / N SNPs excluded]	MAF < 1%	NA	0.01	1% / 23,053	0.01	0.01	> 1%	> 1%	-	≥ 1% [exclude if MAF<1% / 72,186]	1% / 55,271	1% / 67,012	< 1%	<0.02	>0	-	-	≥ 1% [exclude if MAF<1%]	≥ 1%	≥ 1%	≥ 1%	≥ 1% [exclude if MAF<1%]	1% / 41,526	0.01	0.05	-	0.01	>=1% (exclude if <1%) / 79893	≥ 1% [exclude if MAF<1%]	≥ 1% [exclude if MAF<1%]	0.01	5% / -	5% / -	≥ 1% [exclude if MAF<1%]	n.a.	> 0	> 0	> 0	> 0	none	> 0 [exclude if MAF=0/ 42,135]	> 0 [exclude if MAF=0/ 46943]	> 0 [exclude if MAF=0/ 45,473]	>0	> 0 [exclude if MAF=0/ 22,036]	> 0	> 0	monomorphic/ 44727
	HWE [filter detail / N SNPs excluded]	pHWE < 10-6	NA	10-6 / NA	10-4 / 470	10-6	10-6 / 39,548	p>10-6	p>10-6	10-4/758	p> 10-6 [exclude if p≤10-6 in controls / 5,810]	10-6 / 3,690	10-6 / 20,469	-	<0.0001	<10-6	-	-	p> 10-5 [exclude if p≤10-5 ]	p> 10-6	p> 10-6	p> 10-6	p> 10-4 [exclude if p≤10-4 ]	10-4 / 57,726	10-6	0.0016	-	10-4	p>1e-7 (exclude if <=1e-7) / 3071	p> 10-4 [exclude if p≤10-4]	p> 10-6 [exclude if p≤10-6 ]	0.001	NA	-	p> 10-6 [exclude if p≤10-6 ]	p> 10-4	provided p for all SNPs but did not exclude	provided p for all SNPs but did not exclude	provided p for all SNPs but did not exclude	provided p for all SNPs but did not exclude	none	p> 10-6 [exclude if p≤10-6 / 2690]	p> 10-6 [exclude if p≤10-6 / 11244]	p> 10-6 [exclude if p≤10-6 / 2685]	<10-6	p> 10-6 [exclude if p≤10-6 / 4316]	p> 10-6	p> 10-6	for MAF>=0.05, HWE p value <5.7x10-7 / for MAF<0.05, HWE p value <1.0x10-4 [223]
	Call rate [filter detail / N SNPs excluded]	call rate <95%	NA		99% / 23,728	0.98	0.96	<90%	<90%	95%/16827	≥ 95% [exclude if <95%/ 39,950]	90% / 5,675	95% / 23,099	< 90%	call rate <95%	≥ 95%	-	-	≥ 98% [exclude if <98%]	≥ 90%	≥ 95%	≥ 95%	≥ 98% [exclude if <98%]	95% (MAF>0.05) or 99% (MAF < 0.05) / 161,149	0.98	0.95	-	0.95	>=97% (exclude if <97%) / 3922	≥ 95% [exclude if <95%]	≥ 90% [exclude if <90%]	0.875	NA	-	≥ 95% [exclude if <95%]	≥ 98%	≥ 95%	≥ 95%	≥ 95%	≥ 95%	exclude <95% if MAF>=5%, exclude <99% if 1<MAF<5%	≥ 90% [exclude if <90% / 2722]	≥ 90% [exclude if <90% / 15014]	≥ 90% [exclude if <90% / 5898]	>90%	≥ 90% [exclude if <90% / 4034]	≥ 90%	≥ 90%	for MAF>=0.05, call rate <0.95 / for MAF<0.05, call rate <0.01 [838]
	Other	None	Multi-allelic SNPs, SNPs with mismatch in alleles between dbSNP and Illumina	95 % (99 % if MAF < 5 % ) / NA	None	None	None	concordance with another DNA is >99.0% n= 1	concordance with another DNA is >99.0% n= 1	autosomal only	map to multiple locations	None	None	None	None	LiftOver fails, failed mapping with 1000Gp1 ref panel,	Individual Callrate: <93% each chip	Individual Callrate: <93% each chip	None	None	None	None	None	Mendel errors > 2 / 536; Duplicate errors > 2 / 1143425052	None	None	None	None	None	Chr X SNPs >1% heterozygous in men	None	None	None	None	None	None	Cluster Separation score less than 0.2 or which had more than 1 Replicate error as defined with the HapMap control samples. Additional hand editing was done for X, Y and Mitochondrial loci.	Cluster Separation score less than 0.2 or which had more than 1 Replicate error as defined with the HapMap control samples. Additional hand editing was done for X, Y and Mitochondrial loci.	Cluster Separation score less than 0.2 or which had more than 1 Replicate error as defined with the HapMap control samples. Additional hand editing was done for X, Y and Mitochondrial loci.	Cluster Separation score less than 0.2 or which had more than 1 Replicate error as defined with the HapMap control samples. Additional hand editing was done for X, Y and Mitochondrial loci.	None	Duplicates check [discordance rate > 3%] / 1770	None	Duplicates check [discordance rate > 3%] / 201	Consistently failing in other studies; Duplicates check [discordance rate > 3%]	n.a.	n.a.	n.a.	n.a.
	SNP number for analysis (directly genotyped/before imputation)	704588	539458	NA	514278	275093	299319	352700	352700	300283	381935	362059	378163	318237	598203	571381	490032	909622	257581	544620	374773	184469	686195	427049	298785	882598	909622	378513	644556	260127	339,569 before imputation 2,608,509 after imputation	18	10	5	12	118839	145202	145202	145202	145202	121554	149302	134909	143294	176,731	168474	185781	185781	141071
IMPUTATION STATS	Imputation software	MMach1 v1.0.15	MACH	IMPUTE	MACH	MACH1.0 ML	IMPUTE	IMPUTE (v2.2.2)	IMPUTE (v2.2.2)	Impute v0.5.0	MACH	IMPUTE (v0.4.2)	MACH	MACH	MACH 1.0.10	IMPUTE v2.3.0	MACH v1.0.9	Impute v0.4.2	BEAGLE v3.1.0	IMPUTE2 v2	IMPUTE2 v2	IMPUTE2 v2	Mach 1 v 1.0.16	IMPUTE	MACH1.0 ML	Impute	Impute (v0.5.0)	IMPUTE	minimac/mach1 1.0.18.c	IMPUTE2 (genotyped SNPs used where available)	Mach
	Reference panel	CEU HapMap 2		HapMap2	HapMap CEU, rel 22 (build 36)	Hapmap CEU, rel 22, build 36	HapMap2 r22	1000 Genomes phase 1	1000 Genomes phase 1	CEU HapMap 2	CEU HapMap 2	HapMap2-r22, build 36	CEU HapMap 2	Hapmap B35rel21		HapMap2-r22, build 36	35;21	36;22	Hapmap CEU, rel 24, build 36	CEU r22	CEU r22	CEU r22	Hapmap CEU, rel 22, build 36	Hapmap B35rel21	Hapmap2	Hapmap CEU, rel 22, build 36	HapMap2		HapMap2 CEU rel 22, build 36	CEUr22	HapMap CEU r22, build 36
	Imputation quality metrics	-	r2hat ≥ 0.3	NA	r2hat > 0.3	r2hat > 0.3	Proper-info > 0.4	proper-info ≥ 0.40	proper-info ≥ 0.40	proper-info > 0.4	r2hat > 0.3	proper-info ≥ 0.40	r2hat > 0.3	-	-	proper-info ≥ 0.40	-	-	no filtering on imputation quality	no filtering done post-imputation	no filtering done post-imputation	no filtering done post-imputation	r2 > 0.3	-	r2hat > 0.3	Proper-info > 0.4	-	Proper-info > 0.4	no filtering on imputation quality	no filtering done post-imputation	no filters
	Other SNP QC filters applied?	-	MAF ≥ 1%	NA	MAF ≥ 1%	-	MAF > 1%	-	-	-	MAF > 1%	MAF ≥ 1%	MAF > 1%	-	-	na	-	-	MAF>0 [exclude if MAF=0]	no filtering done post-imputation	no filtering done post-imputation	no filtering done post-imputation	MAF > 1%	-	-	MAF > 1%	-	MAF>1%, HWE<10-4	MAF>0 [exclude if MAF=0]	no filtering done post-imputation	none
DATA ANALYSIS	Number of SNPs in analysis	2557232	2557253	2602935	2467876	2543887	2473715	2317423	2326600	2544187	2322078	2555899	2423345	2621874	2449205	2635081	2374873	2499815	2472812	2446640	2318671	2184111	2444516	2562566	2543887	2667162	2748910	2352557	2516286	2633391	2608509
	Trait transformation HbA1C	Untransformed	Untransformed	Untransformed	Untransformed	Untransformed	Untransformed	Untransformed	Untransformed	Untransformed	Untransformed	Untransformed	Untransformed	Untransformed	Untransformed	Untransformed	Untransformed	Untransformed	Untransformed	Untransformed	Untransformed	Untransformed	Untransformed	Untransformed	Untransformed	Untransformed	Untransformed	Untransformed	Untransformed	Untransformed	Untransformed	Untransformed	Untransformed	Untransformed	Untransformed	Untransformed	Untransformed	Untransformed	Untransformed	Untransformed	Untransformed	Untransformed	Untransformed	Untransformed	Untransformed	Untransformed	Untransformed	Untransformed	Untransformed
	Adjustments	age,sex,center	sex, date & time of collection, postal delay and nurse (which also adjusts for area of residence)	Sex	Age, sex, and PC	Age and sex	Age and sex	Age, sex	Age, sex	gender, age	Age, gender, clinical center	Age, sex	Sex-specific residuals adjusted for age and age2	age, sex, country	age, sex, sex^2	Age, sex, centre, +/- BMI, +/- RG	age, sex	age, sex	HbA1c: age, age2, sex, 10PCs (+/- BMI)	Age, age2, gender, (glucose/BMI), and PC1-PC5	Age, age2, gender, (glucose/BMI), and PC1-PC5	Age, age2, (glucose/BMI), and PC1-PC5	age, sex, PC1-3, (+/- BMI; +- FG)	Age, sex, cohort	Age and sex	Age and sex	age, sex, study center	Age and sex	age, sex, sib relatedness (+/- fasting glucose or BMI)	Age, sex, +/- BMI, +/- fasting glucose, and age2	HbA1c: age, age2, 10PCs (+/- BMI)	Age,age2 (+/- BMI, fasting glucose)	age, sex	Age, sex	Age, sex, age2,+/- BMI	Age, sex (+/ BMI)	Age,age2, sex, cohort (+/- BMI); analysed with DPS and METSIM to account for cryptic relatedness	Age,age2, sex, cohort (+/- BMI); analysed with FIN-D2D 2007 and METSIM to account for cryptic relatedness	Age,age2, sex, cohort (+/- BMI); analysed with FIN-D2D 2007 and DPS to account for cryptic relatedness	Age,age2, sex, cohort (+/- BMI)	Age, sex ± BMI	Age, sex (+/- BMI, FG) and age2	Age, sex	Age, sex	Age, sex, centre, +/- BMI, +/- RG	Age, sex (+/- BMI, FG) and age2	age, sex(+/-BMI, blood cells)	Age,sex (+/- BMI, blood cells)	FPG
	Analysis method	Max likelihood regression on dose	Linear regression	Linear regression	Linear regression	Max likelihood regression on dose	Linear regression	Linear regression	Linear regression	linear regression	Linear regression	Linear regression	Linear mixed effect models	linear regression	Linear regression	Linear regression	Linear regression	Linear regression	Linear regression	Linear regression	Linear regression	Linear regression	Linear regression	linear regression	Max likelihood regression on dose	Linear regression	Linear regression	Linear regression	linear regression	SNPTEST v2.2.0	Linear regression	Mixed-model association	GLM	GLM	Linear regression	Linear regression	Mixed-model association	Mixed-model association	Mixed-model association	Mixed-model association	Linear regression	Linear regression	Linear regression	Linear regression	Linear regression	Linear regression	Linear regression	Linear regression	Linear regression
	Software for analysis	ProbABEL	ProbABEL	SNPTEST	MERLIN offline	ProbABEL	R / SNPTEST	SNPTEST v2.4.0	SNPTEST v2.4.0	Snptest v1.1.4	PLINK and ProbABEL	SNPtest	LMEKIN (R package)	Plink	PLINK	quicktest	MACH2QTL v1.0.4	SNPTEST v1.1.5	PLINK	snptest	snptest	snptest	QUICKTEST	SNPTEST	ProbABEL	Stata	QUICKTEST (v0.94)	SNPTEST	STATA	SNPTEST v2.2.0	ProbABEL	EMMAX	SAS 9.1.3	SAS 9.1.9	SPSS	PLINK	EMMAX	EMMAX	EMMAX	EMMAX	PLINK	PLINK	SNPTEST v2.4.0	SNPTEST v2.4.0	PLINK	PLINK	PLINK	PLINK	PLINK
REFERENCES	Reference cohort (PMID)	PMID: 2646917	PMID:17255346	-	ED292030	-	19079260	PMID: 10466767	PMID: 10466767	8927780	17463246	-	-	-	-	PMID: 21717116	16032514	16032514	18075776; 25502107; 26333164	21909115	18940312, 20549180	18193046	11258203	18197199	18760389	21378988	11565448	19729412	23137839	23021478; 25431468	18070814	19223598	15380800	-	-	19164808	20459722	11333990	19223598	16801592	PMID:9329309	17257284			PMID: 21717116		n.a.	n.a.	n.a.
	Reference GWAS (PMID)	-	PMID: 17130525	-	-	18327257	19079260	PMID 23563607	PMID 23563607	17293876		-	-	-	-	PMID: 21717116	19503597	19503597						18197199	-	26343387	-	-				NA		-	-	-									PMID: 21717116	-	n.a.	n.a.	-
	Website	http://www.cscc.unc.edu/aric/index.php	http://www.b58cgene.sgul.ac.uk/	http://www.b58cgene.sgul.ac.uk/	http://www.grc.nia.nih.gov/branches/blsa/blsa.htm	http://www.hgu.mrc.ac.uk/people/c.hayward.html	http://www.decode.is	http://www.srl.cam.ac.uk/epic/	http://www.srl.cam.ac.uk/epic/	-	http://www.broad.mit.edu/diabetes	http://www.mrc-epid.cam.ac.uk/Studies/Fenland/	http://www.ncbi.nlm.nih.gov/projects/gap/cgi-bin/study.cgi?study_id=phs000007.v5.p3	-	http://www.terveys2000.fi/indexe.html	http://www.inter-act.eu/	http://epi.helmholtz-muenchen.de/kora-gen/index_e.php	http://epi.helmholtz-muenchen.de/kora-gen/index_e.php	http://www.lifelines.net/	http://www.lolipopstudy.org/	http://www.lolipopstudy.org/	http://www.lolipopstudy.org/	http://www.luric-study.com	http://www.tweelingenregister.org/	http://www.orcades.ed.ac.uk/orcades/orcades2.html	www.well.ox.ac.uk/procardis	http://ship.community-medicine.de	-	http://ki.se/ki/jsp/polopoly.jsp?l=en&d=13017&a=45456	http://www.trails.nl		NA	http://www.cdc.gov/nchs/products/elec_prods/subject/nhanes3.htm	-	-	-	-	-	-	-		http://www.mrc-epid.cam.ac.uk/Studies/Ely/			http://www.inter-act.eu/	http://www.mrc-epid.cam.ac.uk/Studies/Fenland/	http://epi.gsf.de/kora-gen/index_e.php	http://epi.gsf.de/kora-gen/index_e.php	www.ifb-adipositas.de
[truncated: 36 more columns]
