# Supplementary material for: Impact of common genetic determinants of Hemoglobin A1c on type 2 diabetes risk and diagnosis in ancestrally diverse populations: A transethnic genome-wide meta-analysis
Source: PLoS Med. 2017 Sep 12;14(9):e1002383. doi: 10.1371/journal.pmed.1002383 (PMC5595282; doi:10.1371/journal.pmed.1002383)
Supplement: S3 Table — (XLSX) [file pmed.1002383.s004.xlsx]

## Sheet: S3 Table
S3 Table. Attenuation of glycated hemoglobin variant (HbA1c) effect size in association models conditioned on fasting glucose (FG), 2hr glucose (2hrGlu), hemoglobin level (Hb), mean corpuscular volume (MCV), and mean corpuscular hemoglobin (MCH) for the lead HbA1c-associated variants.
.			European ancestry FG-adjusted (N=53,745)	African American FG-adjusted (N=7,099)	East Asian FG-adjusted (N=15,077)	South Asian FG-adjusted (N=6,052)	European 2hrGlu-adjusted (N=6,880)	European Hb-adjusted (N=21,812)	African American Hb-adjusted (N=1,915)	South Asian Hb-adjusted (N=5,616)	European MCV-adjusted (N=14,866)	African American MCV-adjusted (N=1,915)	South Asian MCV-adjusted (N=5,614)	European MCH-adjusted (N=7,284)	South Asian MCH-adjusted (N=5,607)
SNP	Gene	Classification	% difference in effect size	% difference in effect size	% difference in effect size	% difference in effect size	% difference in effect size	% difference in effect size	% difference in effect size	% difference in effect size	% difference in effect size	% difference in effect size	% difference in effect size	% difference in effect size	% difference in effect size
rs2375278	SYF2	Unclassified	-0.1	NA	NA	NA	NA	-0.01	NA	NA	0.08	NA	NA	0.02	NA
rs267738	CERS2	Unclassified	-0.17	NA	NA	NA	NA	-0.02	NA	NA	NA	NA	NA	NA	NA
rs12132919	TMEM79	Erythrocytic	0	-0.06	-0.01	NA	NA	-0.03	NA	NA	NA	NA	NA	NA	NA
rs857691	SPTA1	Erythrocytic	0.04	-0.16	-0.13	NA	-0.031	-0.03	NA	NA	0.06	NA	NA	0.02	NA
rs17509001	ATAD2B	Unclassified	-0.05	NA	NA	NA	NA	0.03	NA	NA	-0.07	NA	NA	NA	NA
rs12621844	FOXN2	Unclassified	-0.1	NA	NA	NA	NA	-0.02	NA	NA	0	NA	NA	NA	NA
rs13387347	G6PC2	Glycemic	NA	NA	-0.46	NA	0	NA	NA	NA	NA	NA	NA	NA	NA
rs560887	G6PC2	Glycemic	-0.43	NA	NA	NA	-0.009	0.02	NA	NA	0.01	NA	NA	0.28	NA
rs17256082	SCRN3	Unclassified	-0.03	0.01	0.01	NA	-0.016	NA	NA	NA	NA	NA	NA	-0.01	NA
rs7616006	SYN2	Erythrocytic	0.04	NA	0.02	NA	NA	-0.02	NA	NA	NA	NA	NA	NA	NA
rs9818758	USP4	Unclassified	0.32	NA	NA	NA	NA	0.04	NA	NA	NA	NA	NA	NA	NA
rs11708067	ADCY5	Glycemic	-0.47	NA	-	NA	NA	0.03	NA	NA	0.01	NA	NA	NA	NA
rs8192675	SLC2A2	Glycemic	-0.24	-0.12	NA	NA	-0.146	-0.02	-0.02	NA	NA	-0.04	NA	NA	NA
rs4894799	FNDC3B	Unclassified	-0.02	NA	-0.09	NA	-0.072	-0.01	NA	NA	NA	NA	NA	NA	NA
rs13134327	FREM3	Glycemic	-0.13	NA	NA	NA	NA	-0.01	NA	NA	-0.06	NA	NA	-0.1	NA
rs11954649	SOX30	Unclassified	-	-0.19	-	-	-	-	NA	-	-	NA	-	-	-
rs7756992	CDKAL1	Glycemic	-0.32	NA	-0.17	NA	-0.188	-0.01	NA	NA	0.11	NA	NA	0.1	NA
rs1800562	HFE	Erythrocytic	0.08	0.38	-	-	-0.064	-0.04	0.01	-	-0.22	0.03	-	-0.29	-
rs198846	HFE	Erythrocytic	-0.04	NA	-0.02	NA	0.033	-0.04	NA	NA	-0.27	NA	NA	NA	NA
rs11964178	C6orf183	Erythrocytic	-0.07	NA	0.16	NA	NA	0.02	NA	NA	-0.16	NA	NA	NA	NA
rs11154792	MYB	Erythrocytic	-0.14	NA	0.04	NA	-	0.02	NA	NA	NA	-	NA	NA	NA
rs592423	CITED2	Erythrocytic	-0.03	NA	NA	NA	-0.007	0.01	NA	NA	0.27	NA	NA	NA	NA
rs2191349	DGKB	Glycemic	NA	NA	NA	NA	NA	NA	-0.02	NA	NA	-0.07	NA	NA	NA
rs4607517	GCK	Glycemic	-0.31	NA	-0.32	NA	-0.158	0	NA	-0.01	0.02	NA	-0.04	0.23	-0.04
rs3824065	GCK	Glycemic	-0.3	NA	NA	NA	NA	0.03	NA	NA	0.03	NA	NA	0.06	NA
rs6474359	ANK1	Unclassified	-0.09	NA	-0.11	NA	-0.013	-0.01	NA	NA	0.02	NA	NA	-0.03	NA
rs4737009	ANK1	Erythrocytic	-0.02	NA	-0.09	NA	0.005	-0.01	NA	NA	0.09	NA	NA	0.09	NA
rs6980507	SLC20A2	Erythrocytic	0.05	NA	-0.01	-0.15	0.009	-0.04	NA	NA	0.01	NA	NA	NA	NA
rs11558471	SLC30A8	Glycemic	-0.45	NA	-0.39	NA	-0.075	0.02	NA	NA	0.07	NA	NA	NA	NA
rs2383208	MTAP	Glycemic	-0.28	NA	-0.4	NA	NA	0	NA	NA	0.01	NA	NA	NA	NA
rs7040409	C9orf47	Erythrocytic	0.09	NA	-	NA	NA	0	NA	NA	0.06	NA	NA	NA	NA
rs1467311	KLF4	Unclassified	-0.07	NA	-0.21	NA	-0.03	NA	NA	NA	NA	NA	NA	NA	NA
rs579459	ABO	Glycemic	-0.3	NA	-0.2	NA	NA	-0.06	NA	NA	0.1	NA	NA	NA	NA
rs4745982	HK1	Erythrocytic	0.04	NA	-	0.2	0.081	-0.01	NA	-0.19	-0.05	NA	-0.19	NA	-0.2
rs10823343	HK1	Unclassified	0.04	NA	NA	NA	0.033	-0.01	NA	NA	-0.06	NA	NA	-0.02	NA
rs17747324	TCF7L2	Glycemic	-0.4	NA	NA	-0.25	NA	-0.01	NA	0	0.06	NA	-0.03	NA	-0.07
rs3782123	BET1L	Unclassified	0.04	NA	NA	NA	NA	-0.02	-	NA	-0.06	-	NA	NA	NA
rs2237896	KCNQ1	Glycemic	NA	NA	-0.24	NA	NA	NA	NA	NA	NA	NA	NA	NA	NA
rs174577	FADS2	Glycemic	NA	-0.02	-0.35	NA	0.066	NA	NA	NA	NA	NA	NA	NA	NA
rs11603334	ARAP1	Glycemic	-0.37	NA	NA	NA	NA	0.01	NA	NA	0.03	NA	NA	0.03	NA
rs10830963	MTNR1B	Glycemic	NA	NA	-0.33	NA	-0.031	-0.01	NA	-0.08	-0.01	NA	-0.04	-0.01	-0.05
rs11224302	CNTN5	Erythrocytic	-0.11	NA	0.08	NA	NA	0	NA	NA	0.04	NA	NA	NA	NA
rs2110073	PHB2	Unclassified	0.01	NA	-0.13	NA	NA	0.01	NA	NA	-0.01	NA	NA	NA	NA
rs2408955	SENP1	Erythrocytic	0.01	NA	NA	NA	NA	0.01	NA	NA	-0.05	NA	NA	NA	NA
rs10774625	ATXN2	Erythrocytic	-0.03	NA	-	-0.24	0.075	-0.07	NA	0	-0.09	NA	-0.02	NA	-0.01
rs11619319	PDX1	Glycemic	-0.35	NA	NA	NA	NA	-0.03	NA	NA	0.03	NA	NA	NA	NA
rs576674	KL	Glycemic	NA	NA	NA	NA	NA	NA	NA	-0.09	NA	NA	-0.15	NA	-0.19
rs282587	ATP11A	Unclassified	-0.01	-0.01	NA	-0.16	NA	0	NA	NA	0.03	NA	NA	NA	-0.24
rs9604573	GAS6	Unclassified	0.01	NA	NA	NA	-0.032	0.02	NA	NA	-0.05	NA	NA	NA	NA
rs11248914	ITFG3	Erythrocytic	-0.2	NA	NA	NA	NA	-0.02	NA	NA	NA	NA	NA	NA	NA
rs1558902	FTO	Unclassified	-0.21	NA	NA	NA	NA	NA	NA	NA	NA	NA	NA	NA	NA
rs4783565	CDH3	Erythrocytic	-0.15	NA	0.01	NA	0.068	0	NA	NA	NA	NA	NA	NA	NA
rs837763	CDT1	Erythrocytic	-0.09	NA	-0.12	NA	NA	-0.04	NA	NA	0.11	NA	NA	NA	NA
rs9914988	ERAL1	Erythrocytic	0.1	NA	-0.01	NA	-0.071	-0.03	NA	NA	-0.16	NA	NA	-0.25	NA
rs2073285	TMC6	Unclassified	0.05	NA	0.15	NA	NA	0	NA	NA	0.13	NA	NA	0.13	NA
rs1046896	FN3KRP	Unclassified	-0.05	0.02	0.04	0.22	-0.012	0.01	NA	0.12	-0.03	NA	0.11	-0.01	0.12
rs11086054	MYO9B	Unclassified	-0.11	NA	-0.12	NA	NA	0	NA	NA	0.03	NA	NA	NA	NA
rs17533903	MYO9B	Erythrocytic	-0.02	NA	NA	0.17	NA	-0.01	NA	0.27	0.08	NA	0.26	NA	0.19
rs4820268	TMPRSS6	Erythrocytic	0.04	NA	NA	NA	0.03	-0.02	NA	NA	-0.29	NA	NA	NA	NA
rs1050828	G6PD	Erythrocytic	-	0.186	-	-	NA	-	-	-	-	-	-	-	-
FG = Fasting Glucose; 2hrGlu = 2hr glucose; Hb = hemoglobin concentration; MCV = mean corpuscular volume;
MCH = mean corpuscular hemoglobin concentration
NA = P-value in either/both conditional models was not < 0.05
