# Supplementary material for: Impact of common genetic determinants of Hemoglobin A1c on type 2 diabetes risk and diagnosis in ancestrally diverse populations: A transethnic genome-wide meta-analysis
Source: PLoS Med. 2017 Sep 12;14(9):e1002383. doi: 10.1371/journal.pmed.1002383 (PMC5595282; doi:10.1371/journal.pmed.1002383)
Supplement: S4 Table — (XLSX) [file pmed.1002383.s005.xlsx]

## Sheet: S4 Table
S4 Table. Baseline characteristics among those who developed incident type 2 diabetes (T2D) during follow-up and among those who did not, by cohort and ethnicity.
	ARIC				MESA						FHS		InterAct		SCHS
	European		African		European		African		Asian		European		European		Asian
Baseline characteristics	No T2D	Incident T2D	No T2D	Incident T2D	No T2D	Incident T2D	No T2D	Incident T2D	No T2D	Incident T2D	No T2D	Incident T2D	No T2D (subcohort)	Incident T2D (cases)	No T2D (controls)	Incident T2D (cases)
N (%)	5696	432	947	141	1600	141	697	121	343	53	1,540	165	15376	12407	2339	2338
	(93.0)	(7.0)	(87.0)	(13.0)	(91.9)	(8.1)	(85.21)	(14.79)	(86.62)	(13.38)	(90.32)	(9.68)	(55.34)	(44.66)	(50.01)	(49.99)
Age, years, mean (SD)	56.9	57.1	55.5	55.5	60.92	60.35	60.03	59.26	59.52	59.21	54.43	56.53	52.24	55.59	55.22	55.32
	(5.6)	(5.6)	(5.7)	(5.2)	(9.63)	(8.23)	(9.28)	(9.41)	(9.54)	(9.52)	(10.07)	(8.97)	(9.21)	(7.68)	(7.14)	(7.18)
Female; N (%)	3174	192	626	92	851	66	396	69	166	26	871	76	9,649	6,238	1247	1227
	(55.7)	(44.4)	(66.1)	(65.2)	(53.19)	(46.81)	(56.81)	(57.02)	(48.4)	(49.06)	(56.60)	(46.10)	(62.75)	(50.29)	(53.31)	(52.48)
FG/glucose, mg/dL, mean (SD)	100.3	112.0	102.4	111.6	4.78	5.57	4.89	5.56	4.99	5.7	5.24	5.90	4.89	6.38	NA	NA
	(8.8)	(9.0)	(9.3)	(8.3)	(0.48)	(0.71)	(0.53)	(0.66)	(0.48)	(0.67)	(0.49)	(0.53)	(1.15)	(2.63)
HbA1c, % points, mean (SD)	5.35	5.78	5.60	6.10	5.28	5.96	5.52	6.25	5.44	6.16	5.23	5.52	5.43	6.14	5.54	NA
	(0.34)	(0.45)	(0.51)	(0.54)	(0.33)	(0.75)	(0.44)	(0.85)	(0.33)	(1.00)	(0.61)	(0.61)	(0.39)	(1.00)	(0.2)
BMI, kg/m2, mean (SD)	26.65	30.47	28.98	33.37	27.26	31.6	29.59	32.55	23.65	25.68	26.94	30.38	25.83	29.73	22.63	24.91
	(4.45)	(5.41)	(5.52)	(6.94)	(4.72)	(6.04)	(5.65)	(5.09)	(3.02)	(3.55)	(4.63)	(4.88)	(4.09)	(4.74)	(3.34)	(3.57)
Family history, N (%)	1160	138	245	45	NA	NA	NA	NA	NA	NA	158	34	1,381	2,226	NA	NA
	(20.4)	(31.9)	(25.9)	(31.9)							(10.30)	(20.60)	(17.93)#	(36.09)#
GS-G, mean (SD)	18.77	19.26	19.57	19.51	19.09	19.63	19.45	19.59	18.13	18.2	18.67	19.37	19.11	19.55	16.37	16.77
	(3.05)	(3.04)	(2.47)	(2.60)	(3.1)	(3.05)	(2.55)	(2.72)	(2.91)	(2.93)	(3.01)	(3.20)	(3.13)	(3.10)	(2.78)	(2.74)
GS-E, mean (SD)	28.95	28.87	36.11	34.75	29.85	29.57	33.76	33.26	20.93	21.38	27.95	27.66	29.63	29.67	15.00	15.09
	(2.64)	(2.75)	(6.59)	(7.36)	(2.49)	(2.83)	(5.93)	(6.64)	(2.61)	(2.51)	(2.30)	(2.50)	(2.69)	(2.70)	(2.13)	(2.11)
InterAct is a case-cohort study, SCHS is case-control study, ARIC, MESA and FHS are population-based cohort studies
# data on family history of T2D was only collected in certain cohorts (total N = 13,869, 49.9%)
NA: not available; BMI: Body-Mass-Index; FG: fasting glucose; GS-G: glycemic genetic score; GS-E: erythrocytic genetic score
