# Supplementary material for: Impact of common genetic determinants of Hemoglobin A1c on type 2 diabetes risk and diagnosis in ancestrally diverse populations: A transethnic genome-wide meta-analysis
Source: PLoS Med. 2017 Sep 12;14(9):e1002383. doi: 10.1371/journal.pmed.1002383 (PMC5595282; doi:10.1371/journal.pmed.1002383)
Supplement: S8 Table — (XLSX) [file pmed.1002383.s009.xlsx]

## Sheet: S8 Table
S8 Table. Proportion of additional variance explained over age and sex in measured glycated hemoglobin (HbA1c) by erythryocytic genetic variants and by all genome-wide significant genetic variants by ethnicity.
Ancestry	Cohort	SNPs in model	Variance explained	N
European	FHS (offspring)	20 erythrocytic SNPs	0.0161	2112
		All 55 SNPs	0.0508	2112
	FHS (3rd generation)	20 erythrocytic SNPs	0.024	2874
		All 55 SNPs	0.0445	2874
	ARIC	21 erythrocytic SNPs	0.0192	6503
		All 56 SNPs	0.0419	6503
	MESA	21 erythrocytic SNPs	0.0263	2255
		All 57 SNPs	0.0578	2255
African American	ARIC	20 erythrocytic SNPs	0.0718	1232
		All 59 SNPs	0.0965	1232
	MESA	21 erythrocytic SNPs	0.0567	1217
		All 56 SNPs	0.0885	1217
Asian	MESA	20 erythrocytic SNPs	0.0297	624
		All 55 SNPs	0.0917	624
	TAICHI	15 erythrocytic SNPs	0.0246	398
		All 55 SNPs	0.1432	398
	SP2	16 erythrocytic SNPs	0.0141	1967
		All 53 SNPs	0.0599	1967
