# Supplementary material for: Impact of common genetic determinants of Hemoglobin A1c on type 2 diabetes risk and diagnosis in ancestrally diverse populations: A transethnic genome-wide meta-analysis
Source: PLoS Med. 2017 Sep 12;14(9):e1002383. doi: 10.1371/journal.pmed.1002383 (PMC5595282; doi:10.1371/journal.pmed.1002383)
Supplement: S10 Table — (XLSX) [file pmed.1002383.s011.xlsx]

## Sheet: S10 Table
S10 Table. Mean difference in glycated hemoglobin (HbA1c) between the top and bottom 5 percentile of Genetic Score-Erythrocytic (GS-E) by ancestry.
			GS-E
Ancestry	Cohort	HbA1c (%-points)	Bottom 5 percentile	5 to 95 percentile	Top 5 percentile	All
European	FHS
		mean	5.13153	5.25939	5.28453	5.25429
		SD	0.55539	0.62015	0.67025	0.620027
		N	85	1534	86	1705
	InterAct
		mean	5.34307	5.47239	5.58911	5.4717
		SD	0.457324	0.458988	0.407154	0.458087
		N	476	8587	471	9534
	ARIC
		mean	5.27	5.45	5.58	5.44
		SD	0.48	0.52	0.6	0.52
		N	326	5851	326	6503
	MESA
		mean	5.25	5.36	5.5	5.36
		SD	0.45	0.41	0.68	0.43
		N	133	1996	91	2220
African American	ARIC
		mean	5.06	5.85	5.85	5.81
		SD	0.59	0.74	0.57	0.75
		N	62	1108	62	1232
	MESA
		mean	4.9	5.67	5.75	5.62
		SD	0.4	0.57	0.45	0.58
		N	72	1059	40	1171
East Asian	MESA
		mean	5.45	5.55	5.53	5.54
		SD	0.38	0.51	0.47	0.51
		N	30	550	24	604
	SCHS
		mean	5.507	5.54	5.567	5.539
		SD	0.270896	0.287408	0.288869	0.2867
		N	100	1792	100	1992
European	FHS, InterAct, ARIC MESA	pooled mean	5.28995	5.43443	5.55084	5.43038
		pooled SD	0.471734	0.487169	0.520138	0.488961
		N	1020	17968	974	19962
African American	ARIC, MESA	pooled mean	4.97403	5.76204	5.81078	5.71741
		pooled SD	0.487803	0.656924	0.5232	0.66716
		N	134	2167	102	2403
East Asian	MESA, SCHS	pooled mean	5.49385	5.54235	5.55984	5.53923
		pooled SD	0.295615	0.339632	0.323017	0.338608
		N	130	2342	124	2596
		Difference Top - bottom 5 percentiles	SE	95% CI		P
European	FHS, InterAct, ARIC MESA	0.25548	0.022218	0.217227	0.304373	8.189e-31
African American	ARIC, MESA	0.8468	0.066146	0.706482	0.967118	2.689e-28
East Asian	MESA, SCHS	0.066	0.0388224	-0.0104577	0.142458	0.0903554
