# Supplementary material for: Impact of common genetic determinants of Hemoglobin A1c on type 2 diabetes risk and diagnosis in ancestrally diverse populations: A transethnic genome-wide meta-analysis
Source: PLoS Med. 2017 Sep 12;14(9):e1002383. doi: 10.1371/journal.pmed.1002383 (PMC5595282; doi:10.1371/journal.pmed.1002383)
Supplement: S12 Table — (XLSX) [file pmed.1002383.s013.xlsx]

## Sheet: S12 Table
S12 Table. Estimated number of African Americans with type 2 diabetes (T2D) in the US whose diagnosis would be missed due to the glycose-6-phosphate dehydrogenase (G6PD) variant if screened with glycated hemoglobin (HbA1c).
Total population		Estimated proportion with G6PD variant (%)	Estimated proportion with missed T2D diagnosis (%)
(N=29.93 million)
Diagnosed T2D (%)	13.45 (11.81, 15.09)
Undiagnosed T2D by HbA1c ≥ 6.5 (%)	2.50 (1.16, 3.85)		-
Men with HbA1c 5.7-6.5 (%)	12.70 (11.45, 13.94)	T: 11.0	1.56 (1.38, 1.74)
Women with HbA1c 5.8-6.5 (%)	12.91 (1.079, 15.02)	TT: 1.2	0.16 (0.13, 0.18)
Women with HbA1c 6.2-6.5 (%)	2.33 (1.07, 3.59)	CT: 19.6	0.46 (0.21, 0.70)
Total number of people with undiagnosed T2D due to G6PD variant:			2.17 (1.88, 2.46)
			0.65 (0.56, 0.74) million
Men
(N=13.96 million)
Diagnosed T2D (%)	13.33 (11.00, 15.67)
Undiagnosed T2D by HbA1c ≥ 6.5 (%)	2.40 (0.81, 3.98)		-
Men with HbA1c 5.7-6.5 (%)	28.32 (25.51, 31.13)	T: 11.0	3.11 (2.81, 3.42)
Total number of men with undiagnosed T2D due to G6PD variant:			3.11 (2.81, 3.42)
			0.43 (0.39, 0.48) million
Women
(N=15.97 million)
Diagnosed T2D (%)	13.54 (10.12, 16.96)
Undiagnosed T2D by HbA1c ≥ 6.5 (%)	2.58 (0.94, 4.22)		-
Women with HbA1c 5.8-6.5 (%)	23.39 (19.45, 27.33)	TT: 1.2	0.28 (0.24, 0.33)
Women with HbA1c 6.2-6.5 (%)	4.22 (2.09, 6.34)	CT: 19.6	0.83 (0.41, 1.24)
Total number of women with undiagnosed T2D due to G6PD variant:			1.11 (0.67, 1.55)
			0.18 (0.11, 0.25) million
